# Supplementary material for: Locally Isolated Trichoderma harzianum Species Have Broad Spectrum Biocontrol Activities against the Wood Rot Fungal Species through Both Volatile Inhibition and Mycoparasitism
Source: J Fungi (Basel). 2023 Jun 15;9(6):675. doi: 10.3390/jof9060675 (PMC10301622; doi:10.3390/jof9060675)
Supplement: Supplementary file 1 [file jof-09-00675-s001.zip › Supplementary Table S1 of GC-MS data.xlsx]

## Sheet: CE0
CE0
Detected volatiles	Analysis quality (%)	Area (in million units) (% of total)	Elution time (min)	Structure	CAS number
Propane, 2-ethoxy-	50	26.7 (1.11%)	2.777	C5H12O	000625-54-7
Benzene, methyl-	86	7.5 (0.31%)	3.28	C7H8	000108-88-3
2,3-Butanediol	78	21.8 (0.90%)	3.979	C4H10O2	000513-85-9
Cyclotrisiloxane, hexamethyl-	87	16.8 (0.70%)	4.34	C6H18O3Si3	000541-05-9
3-Octanone	38	16.1 (0.67%)	8.353	C8H16O	000106-68-3
Cyclotetrasiloxane, octamethyl-	72	16.5 (0.69%)	8.745	C8H24O4Si4	000556-67-2
1-Butanol, 2-ethyl-	32	35.7 (1.48%)	11.573	C6H14O	000097-95-0
Phenylethyl Alcohol	93	89.1 (3.70%)	12.092	C8H10O	000060-12-8
2-Ethylhexyl acrylate	56	12.8 (0.53%)	15.942	C11H20O2	000103-11-7
Nonane, 2-methyl-	64	18.6 (0.77%)	21.994	C10H22	000871-83-0
1,4-Methanoazulene, decahydro-4,...	50	35.5 (1.47%)	22.328	C15H24	000475-20-7
Cadina-1,4-diene	91	195.8 (8.13%)	22.587	C15H24	029837-12-5
(R)-1-Methyl-4-(6-methylhept-5-e...	86	102.7 (4.26%)	22.815	C15H24	028976-67-2
1,3,6,10-Dodecatetraene, 3,7,11-...	93	21.0 (0.87%)	23.186	C15H24	026560-14-5
p-Cymene	87	7.2 (0.30%)	23.609	C10H14	000099-87-6
1H-Cycloprop[e]azulene, decahydr...	84	30.3 (1.26%)	24.493	C15H24	072747-25-2
Benzene, 1-methyl-4-(1,2,2-trime...	97	6.6 (0.27%)	25.568	C15H22	016982-00-6
(1R,5R)-1,8-Dimethyl-4-(propan-2..	90	15.5 (0.64%)	25.838	C15H24	099529-78-9
Phenol, 3,5-bis(1,1-dimethylethyl)-	87	16.4 (0.68%)	25.96	C14H22O	001138-52-9
4-Isopropyl-1,6-dimethyl-1,2,3,4..	93	8.8 (0.37%)	26.188	C15H22	000483-77-2
trans-Calamenene	94	13.2 (0.55%)	26.537	C15H22	073209-42-4
Naphthalene, 1,2,3,4-tetrahydro-...	94	13.2 (0.55%)	26.537	C15H22	000483-77-2
Pentane, 2-methyl-	59	97.8 (4.06%)	28.814	C6H14	000107-83-5
2-(Prop-2-enoyloxy)pentadecane	37	23.7 (0.98%)	29.937	C18H34O2	997498-22-7
2,4,7,9-Tetramethyl-5-decyn-4,7-...	25	46.7 (1.94%)	31.06	C14H26O2	000126-86-3
.alpha.-Cedrene oxide	27	127.1 (5.28%)	31.743	C15H24O	029597-36-2
(-)-Globulol	93	9.5 (0.39%)	33.437	C15H26O	000489-41-8
2-Acetoxybenzonitrile	46	30.3 (1.26%)	33.935	C9H7NO2	005715-02-6
(E)-2-(4-methylpent-3-enyl)-2-bu...	50	13.8 (0.57%)	37.774	C10H14O2	997109-72-1
caryophylla-3,8(13)-dien-5.beta.-ol	43	13.5 (0.56%)	38.595	C15H24O	997276-34-3
4a,7-Methano-4aH-naphth[1,8a-b]o..	92	6.2 (0.26%)	39.003	C15H24O	067999-56-8
Estr-4-en-3-one	35	12.9 (0.54%)	41.566	C18H26O	004811-77-2

## Sheet: CE1
CE1
Detected volatiles	Analysis quality (%)	Area (in million units) (% of total)	Elution time (min)	Structure	CAS number
5-(4-Nitrophenyl)-1,3,4-oxadiazo...	92	3.5 (0.26%)	4.334	C8H5N3O4	041125-77-3
1H-Isoindole-1,3(2H)-dithione, 2...	90	2.2 (0.16%)	4.424	C10H9NS2	035373-06-9
3-Octanone	64	11.1 (0.82%)	8.353	C8H16O	000106-68-3
1,1,3,3,5,5,7,7-Octamethyl-7-(2-...	59	6.5 (0.48%)	8.745	C12H34O5Si4	997767-22-4
4-Isopropylidene-1-cyclohexene	83	36.0 (2.67%)	11.568	C10H16	000586-62-9
Phenylethyl Alcohol	94	95.5 (7.07%)	12.076	C8H10O	000060-12-8
Benzeneethanol	93	2.2 (0.17%)	12.568	C8H10O	000060-12-8
2-Ethylhexyl acrylate	72	14.1 (1.04%)	15.942	C11H20O2	000103-11-7
Italicene	90	3.3 (0.25%)	21.189	C15H24	997220-41-0
1,4-Methanoazulene, decahydro-4,...	43	22.4 (1.66%)	22.322	C15H24	000475-20-7
Cadina-1,4-diene	94	134.1 (9.92%)	22.561	C15H24	029837-12-5
Acora-2,4-diene	80	55.1 (4.08%)	22.778	C15H24	997221-76-9
1,3,6,10-Dodecatetraene, 3,7,11-...	91	20.8 (1.54%)	23.18	C15H24	026560-14-5
.gamma.-Cadinene	89	2.0 (0.15%)	24.086	C15H24	030021-74-0
1,3-Cyclohexadiene, 5-(1,5-dimet...	68	24.3 (1.80%)	24.483	C15H24	000495-60-3
1,4-Methanoazulene, decahydro-4,...	95	3.6 (0.27%)	25.743	C15H24	000475-20-7
(1R,5R)-1,8-Dimethyl-4-(propan-2...	90	16.6 (1.23%)	25.833	C15H24	099529-78-9
Phenol, 2,6-bis(1,1-dimethylethyl)-	93	12.9 (0.96%)	25.934	C14H22O	000128-39-2
cis-Calamenene	90	1.8 (0.13%)	26.532	C15H22	072937-55-4
1,6,10-Dodecatrien-3-ol, 3,7,11-...	90	9.8 (0.73%)	27.655	C15H26O	007212-44-4
3-(oxiran-2-yl)propyl acetate	64	16.5 (1.22%)	28.772	C7H12O3	059287-65-9
3-Cyclohexen-1-carboxaldehyde, 3...	27	57.7 (4.27%)	31.033	C9H14O	997051-07-9
3-Cyclohexen-1-carboxaldehyde, 3...	43	9.4 (0.69%)	31.25	C9H14O	997051-07-9
1H-Benzocyclohepten-7-ol, 2,3,4,...	42	10.2 (0.76%)	31.34	C15H26O	006892-80-4
2-tert-butyl-5-methyl-1,4-benzoq...	43	88.3 (6.54%)	31.706	C11H14O2	997140-87-3
Benzene, 1,2,4,5-tetrachloro-3,6...	96	4.9 (0.36%)	32.537	C8H6Cl4O2	000944-78-5
(-)-Globulol	50	31.3 (2.31%)	33.924	C15H26O	000489-41-8
1-Cyclohexene-1-methanol	50	16.0 (1.19%)	37.769	C7H12O	004845-04-9
(-)-Periplanone B	38	14.0 (1.03%)	38.595	C15H20O3	061228-92-0
3,4-Pentadienal, 2,2-dimethyl-	38	5.2 (0.39%)	39.103	C7H10O	004058-51-9
Androst-5-en-4-one	27	18.6 (1.38%)	41.566	C19H28O	013583-72-7

## Sheet: CE0 vs CE1
CE0							CE1
Detected volatiles	Analysis quality (%)	Area (in million units) (% of total)	Elution time (min)	Structure	CAS number		Detected volatiles	Analysis quality (%)	Area (in million units) (% of total)	Elution time (min)	Structure	CAS number
Propane, 2-ethoxy-	50	26.7 (1.11%)	2.777	C5H12O	000625-54-7
Benzene, methyl-	86	7.5 (0.31%)	3.28	C7H8	000108-88-3
2,3-Butanediol	78	21.8 (0.90%)	3.979	C4H10O2	000513-85-9
Cyclotrisiloxane, hexamethyl-	87	16.8 (0.70%)	4.34	C6H18O3Si3	000541-05-9		5-(4-Nitrophenyl)-1,3,4-oxadiazo...	92	3.5 (0.26%)	4.334	C8H5N3O4	041125-77-3
							1H-Isoindole-1,3(2H)-dithione, 2...	90	2.2 (0.16%)	4.424	C10H9NS2	035373-06-9
3-Octanone	38	16.1 (0.67%)	8.353	C8H16O	000106-68-3		3-Octanone	64	11.1 (0.82%)	8.353	C8H16O	000106-68-3
Cyclotetrasiloxane, octamethyl-	72	16.5 (0.69%)	8.745	C8H24O4Si4	000556-67-2		1,1,3,3,5,5,7,7-Octamethyl-7-(2-...	59	6.5 (0.48%)	8.745	C12H34O5Si4	997767-22-4
1-Butanol, 2-ethyl-	32	35.7 (1.48%)	11.573	C6H14O	000097-95-0		4-Isopropylidene-1-cyclohexene	83	36.0 (2.67%)	11.568	C10H16	000586-62-9
Phenylethyl Alcohol	93	89.1 (3.70%)	12.092	C8H10O	000060-12-8		Phenylethyl Alcohol	94	95.5 (7.07%)	12.076	C8H10O	000060-12-8
							Benzeneethanol	93	2.2 (0.17%)	12.568	C8H10O	000060-12-8
2-Ethylhexyl acrylate	56	12.8 (0.53%)	15.942	C11H20O2	000103-11-7		2-Ethylhexyl acrylate	72	14.1 (1.04%)	15.942	C11H20O2	000103-11-7
							Italicene	90	3.3 (0.25%)	21.189	C15H24	997220-41-0
Nonane, 2-methyl-	64	18.6 (0.77%)	21.994	C10H22	000871-83-0
1,4-Methanoazulene, decahydro-4,...	50	35.5 (1.47%)	22.328	C15H24	000475-20-7		1,4-Methanoazulene, decahydro-4,...	43	22.4 (1.66%)	22.322	C15H24	000475-20-7
Cadina-1,4-diene	91	195.8 (8.13%)	22.587	C15H24	029837-12-5		Cadina-1,4-diene	94	134.1 (9.92%)	22.561	C15H24	029837-12-5
(R)-1-Methyl-4-(6-methylhept-5-e...	86	102.7 (4.26%)	22.815	C15H24	028976-67-2		Acora-2,4-diene	80	55.1 (4.08%)	22.778	C15H24	997221-76-9
1,3,6,10-Dodecatetraene, 3,7,11-...	93	21.0 (0.87%)	23.186	C15H24	026560-14-5		1,3,6,10-Dodecatetraene, 3,7,11-...	91	20.8 (1.54%)	23.18	C15H24	026560-14-5
p-Cymene	87	7.2 (0.30%)	23.609	C10H14	000099-87-6
							.gamma.-Cadinene	89	2.0 (0.15%)	24.086	C15H24	030021-74-0
1H-Cycloprop[e]azulene, decahydr...	84	30.3 (1.26%)	24.493	C15H24	072747-25-2		1,3-Cyclohexadiene, 5-(1,5-dimet...	68	24.3 (1.80%)	24.483	C15H24	000495-60-3
Benzene, 1-methyl-4-(1,2,2-trime...	97	6.6 (0.27%)	25.568	C15H22	016982-00-6		1,4-Methanoazulene, decahydro-4,...	95	3.6 (0.27%)	25.743	C15H24	000475-20-7
(1R,5R)-1,8-Dimethyl-4-(propan-2..	90	15.5 (0.64%)	25.838	C15H24	099529-78-9		(1R,5R)-1,8-Dimethyl-4-(propan-2...	90	16.6 (1.23%)	25.833	C15H24	099529-78-9
Phenol, 3,5-bis(1,1-dimethylethyl)-	87	16.4 (0.68%)	25.96	C14H22O	001138-52-9		Phenol, 2,6-bis(1,1-dimethylethyl)-	93	12.9 (0.96%)	25.934	C14H22O	000128-39-2
4-Isopropyl-1,6-dimethyl-1,2,3,4..	93	8.8 (0.37%)	26.188	C15H22	000483-77-2
trans-Calamenene	94	13.2 (0.55%)	26.537	C15H22	073209-42-4		cis-Calamenene	90	1.8 (0.13%)	26.532	C15H22	072937-55-4
Naphthalene, 1,2,3,4-tetrahydro-...	94	13.2 (0.55%)	26.537	C15H22	000483-77-2
							1,6,10-Dodecatrien-3-ol, 3,7,11-...	90	9.8 (0.73%)	27.655	C15H26O	007212-44-4
Pentane, 2-methyl-	59	97.8 (4.06%)	28.814	C6H14	000107-83-5		3-(oxiran-2-yl)propyl acetate	64	16.5 (1.22%)	28.772	C7H12O3	059287-65-9
2-(Prop-2-enoyloxy)pentadecane	37	23.7 (0.98%)	29.937	C18H34O2	997498-22-7
2,4,7,9-Tetramethyl-5-decyn-4,7-...	25	46.7 (1.94%)	31.06	C14H26O2	000126-86-3		3-Cyclohexen-1-carboxaldehyde, 3...	27	57.7 (4.27%)	31.033	C9H14O	997051-07-9
							3-Cyclohexen-1-carboxaldehyde, 3...	43	9.4 (0.69%)	31.25	C9H14O	997051-07-9
							1H-Benzocyclohepten-7-ol, 2,3,4,...	42	10.2 (0.76%)	31.34	C15H26O	006892-80-4
.alpha.-Cedrene oxide	27	127.1 (5.28%)	31.743	C15H24O	029597-36-2		2-tert-butyl-5-methyl-1,4-benzoq...	43	88.3 (6.54%)	31.706	C11H14O2	997140-87-3
							Benzene, 1,2,4,5-tetrachloro-3,6...	96	4.9 (0.36%)	32.537	C8H6Cl4O2	000944-78-5
(-)-Globulol	93	9.5 (0.39%)	33.437	C15H26O	000489-41-8		(-)-Globulol	50	31.3 (2.31%)	33.924	C15H26O	000489-41-8
2-Acetoxybenzonitrile	46	30.3 (1.26%)	33.935	C9H7NO2	005715-02-6
(E)-2-(4-methylpent-3-enyl)-2-bu...	50	13.8 (0.57%)	37.774	C10H14O2	997109-72-1		1-Cyclohexene-1-methanol	50	16.0 (1.19%)	37.769	C7H12O	004845-04-9
caryophylla-3,8(13)-dien-5.beta.-ol	43	13.5 (0.56%)	38.595	C15H24O	997276-34-3		(-)-Periplanone B	38	14.0 (1.03%)	38.595	C15H20O3	061228-92-0
4a,7-Methano-4aH-naphth[1,8a-b]o..	92	6.2 (0.26%)	39.003	C15H24O	067999-56-8		3,4-Pentadienal, 2,2-dimethyl-	38	5.2 (0.39%)	39.103	C7H10O	004058-51-9
Estr-4-en-3-one	35	12.9 (0.54%)	41.566	C18H26O	004811-77-2		Androst-5-en-4-one	27	18.6 (1.38%)	41.566	C19H28O	013583-72-7

## Sheet: PN0
PN0
Detected volatiles	Analysis quality (%)	Area (in million units) (% of total)	Elution time (min)	Structure	CAS number
1-Propanol, 2-methyl-	38	38.5 (1.98%)	1.787	C4H10O	000078-83-1
1-Butanol, 3-methyl-	64	27.7 (1.43%)	2.814	C5H12O	000123-51-3
1-Pentene, 4-methyl-	33	60.2 (3.10%)	2.857	C6H12	000691-37-2
Benzaldehyde	91	12.3 (0.64%)	7.681	C7H6O	000100-52-7
Heptane, 2,3-dimethyl-	53	24.4 (1.26%)	8.359	C9H20	003074-71-3
dodecane-2,11-dione	22	18.5 (0.96%)	8.464	C12H22O2	007029-09-6
Cyclotetrasiloxane, octamethyl-	64	18.3 (0.94%)	8.75	C8H24O4Si4	000556-67-2
2-(5-Methyl-5-vinyltetrahydro-2-...	58	148.9 (7.68%)	11.234	C10H18O2	005989-33-3
4-Isopropylidene-1-cyclohexene	50	223.5 (11.53%)	11.658	C10H16	000586-62-9
2-Undecanethiol, 2-methyl-	38	15.2 (0.78%)	11.737	C12H26S	010059-13-9
Octanenitrile, 2-methylene-	53	19.2 (0.99%)	11.8	C9H15N	005633-86-3
2H-Pyran-3-ol, 6-ethenyltetrahyd...	72	20.8 (1.07%)	14.019	C10H18O2	014049-11-7
Azulene	86	6.8 (0.35%)	14.199	C10H8	000275-51-4
Octane, 2,7-dimethyl-	78	10.5 (0.54%)	14.851	C10H22	001072-16-8
1,2-Cyclohexane-3,3,5,5-d4-diol,...	38	14.5 (0.75%)	15.078	C6H8D4O2	053897-44-2
Cyclopropane, 1,2-dimethyl-, trans-	53	11.4 (0.59%)	15.941	C5H10	002402-06-4
1H-Cycloprop[e]azulene, decahydr...	86	6.0 (0.31%)	18.462	C15H24	072747-25-2
Propanoic acid, 2-methyl-, 3-hyd...	45	25.4 (1.31%)	20.998	C12H24O3	074367-34-3
Nonane, 2-methyl-	64	14.3 (0.74%)	21.952	C10H22	000871-83-0
2,6-dibutyl-1,4-benzoquinone	55	11.3 (0.58%)	24.244	C14H20O2	997274-50-4
Octane, 2-methyl-	80	6.7 (0.35%)	25.304	C9H20	003221-61-2
.alpha.-Muurolene	97	19.2 (0.99%)	25.425	C15H24	031983-22-9
Propanoic acid, 2-methyl-, 2-eth...	56	94.6 (4.88%)	28.804	C16H30O4	074367-30-9
2-(Prop-2-enoyloxy)tridecane	37	25.4 (1.31%)	29.921	C16H30O2	997397-83-6
4a,7-Methano-4aH-naphth[1,8a-b]oxirene, octahydro-4,4,8,8-tetramethyl-	96	3.2 (0.16%)	36.662	C15H24O	067999-56-8

## Sheet: PN1
PN1
Detected volatiles	Analysis quality (%)	Area (in million units) (% of total)	Elution time (min)	Structure	CAS number
1-Propanol, 2-methyl-	39	69.2 (1.95%)	1.771	C4H10O	000078-83-1
1-Butanol, 3-methyl-	53	40.9 (1.15%)	2.804	C5H12O	000123-51-3
3-Ethyl-1,3-dimethyldiaziridine ...	38	64.4 (1.82%)	2.851	C5H12N2	054753-24-1
Methyllaurate	91	6.7 (0.19%)	5.351	C8H10	000000-00-0
Bicyclo[4.2.0]octa-1,3,5-triene	96	7.9 (0.22%)	5.896	C8H8	000694-87-1
Benzene, ethenyl-	96	7.9 (0.22%)	5.896	C8H8	000100-42-5
Styrene	96	7.9 (0.22%)	5.896	C8H8	000100-42-5
Benzaldehyde	95	32.8 (0.92%)	7.681	C7H6O	000100-52-7
cis-Linaloloxide	58	73.6 (2.08%)	11.213	C10H18O2	997121-15-5
4-ethyl-3-ethynyl-2H-furan-5-one	83	21.4 (0.61%)	11.43	C8H8O2	109332-79-8
4-Isopropylidene-1-cyclohexene	90	181.1 (5.11%)	11.636	C10H16	000586-62-9
Phenylethyl Alcohol	94	30.2 (0.85%)	12.071	C8H10O	000060-12-8
Benzenepropanenitrile, .beta.-oxo-	86	36.1 (1.02%)	13.887	C9H7NO	000614-16-4
1,1-Dodecanediol, diacetate	43	35.6 (1.00%)	15.084	C16H30O4	056438-07-4
Hexadecane	72	37.5 (1.06%)	17.668	C16H34	000544-76-3
Carbonic acid, prop-1-en-2-yl tr...	72	27.9 (0.79%)	21.962	C17H32O3	997505-07-9
Dimethyl phthalate	95	24.8 (0.70%)	23.958	C10H10O4	000131-11-3
Decane	91	21.0 (0.59%)	24.578	C10H22	000124-18-5
Heptadecane, 2-methyl-	78	80.2 (2.26%)	25.351	C18H38	001560-89-0
Phenol, 2,5-bis(1,1-dimethylethyl)-	96	20.6 (0.58%)	25.95	C14H22O	005875-45-6
Tridecane	72	42.4 (1.20%)	26.876	C13H28	000629-50-5
3-(oxiran-2-yl)propyl acetate	59	182.9 (5.16%)	28.841	C7H12O3	059287-65-9
Adipic acid	37	67.6 (1.91%)	29.958	C6H10O4	000124-04-9
Hexadecane	72	45.5 (1.28%)	32.42	C16H34	000544-76-3
Heptadecane, 2-methyl-	90	15.7 (0.44%)	32.68	C18H38	001560-89-0
1H-Cyclopenta[a]pentalen-7-ol, d...	94	5.3 (0.15%)	33.924	C17H28O2	057984-03-9
Sulfurous acid, butyl pentadecyl...	90	5.9 (0.17%)	37.758	C19H40O3S	997712-57-2
Tetracyclo[6.1.0.0(2,4).0(5,7)]n...	35	18.5 (0.52%)	38.6	C15H24	997220-77-1

## Sheet: PN0 vs PN1
PN0							PN1
Detected volatiles	Analysis quality (%)	Area (in million units) (% of total)	Elution time (min)	Structure	CAS number		Detected volatiles	Analysis quality (%)	Area (in million units) (% of total)	Elution time (min)	Structure	CAS number
1-Propanol, 2-methyl-	38	38.5 (1.98%)	1.787	C4H10O	000078-83-1		1-Propanol, 2-methyl-	39	69.2 (1.95%)	1.771	C4H10O	000078-83-1
1-Butanol, 3-methyl-	64	27.7 (1.43%)	2.814	C5H12O	000123-51-3		1-Butanol, 3-methyl-	53	40.9 (1.15%)	2.804	C5H12O	000123-51-3
1-Pentene, 4-methyl-	33	60.2 (3.10%)	2.857	C6H12	000691-37-2		3-Ethyl-1,3-dimethyldiaziridine ...	38	64.4 (1.82%)	2.851	C5H12N2	054753-24-1
							Methyllaurate	91	6.7 (0.19%)	5.351	C8H10	000000-00-0
							Bicyclo[4.2.0]octa-1,3,5-triene	96	7.9 (0.22%)	5.896	C8H8	000694-87-1
Benzaldehyde	91	12.3 (0.64%)	7.681	C7H6O	000100-52-7		Benzaldehyde	95	32.8 (0.92%)	7.681	C7H6O	000100-52-7
Heptane, 2,3-dimethyl-	53	24.4 (1.26%)	8.359	C9H20	003074-71-3
dodecane-2,11-dione	22	18.5 (0.96%)	8.464	C12H22O2	007029-09-6
Cyclotetrasiloxane, octamethyl-	64	18.3 (0.94%)	8.75	C8H24O4Si4	000556-67-2
2-(5-Methyl-5-vinyltetrahydro-2-...	58	148.9 (7.68%)	11.234	C10H18O2	005989-33-3		cis-Linaloloxide	58	73.6 (2.08%)	11.213	C10H18O2	997121-15-5
							4-ethyl-3-ethynyl-2H-furan-5-one	83	21.4 (0.61%)	11.43	C8H8O2	109332-79-8
4-Isopropylidene-1-cyclohexene	50	223.5 (11.53%)	11.658	C10H16	000586-62-9		4-Isopropylidene-1-cyclohexene	90	181.1 (5.11%)	11.636	C10H16	000586-62-9
2-Undecanethiol, 2-methyl-	38	15.2 (0.78%)	11.737	C12H26S	010059-13-9
Octanenitrile, 2-methylene-	53	19.2 (0.99%)	11.8	C9H15N	005633-86-3
							Phenylethyl Alcohol	94	30.2 (0.85%)	12.071	C8H10O	000060-12-8
							Benzenepropanenitrile, .beta.-oxo-	86	36.1 (1.02%)	13.887	C9H7NO	000614-16-4
2H-Pyran-3-ol, 6-ethenyltetrahyd...	72	20.8 (1.07%)	14.019	C10H18O2	014049-11-7
Azulene	86	6.8 (0.35%)	14.199	C10H8	000275-51-4
Octane, 2,7-dimethyl-	78	10.5 (0.54%)	14.851	C10H22	001072-16-8
1,2-Cyclohexane-3,3,5,5-d4-diol,...	38	14.5 (0.75%)	15.078	C6H8D4O2	053897-44-2		1,1-Dodecanediol, diacetate	43	35.6 (1.00%)	15.084	C16H30O4	056438-07-4
Cyclopropane, 1,2-dimethyl-, trans-	53	11.4 (0.59%)	15.941	C5H10	002402-06-4
							Hexadecane	72	37.5 (1.06%)	17.668	C16H34	000544-76-3
1H-Cycloprop[e]azulene, decahydr...	86	6.0 (0.31%)	18.462	C15H24	072747-25-2
Propanoic acid, 2-methyl-, 3-hyd...	45	25.4 (1.31%)	20.998	C12H24O3	074367-34-3
Nonane, 2-methyl-	64	14.3 (0.74%)	21.952	C10H22	000871-83-0		Carbonic acid, prop-1-en-2-yl tr...	72	27.9 (0.79%)	21.962	C17H32O3	997505-07-9
							Dimethyl phthalate	95	24.8 (0.70%)	23.958	C10H10O4	000131-11-3
2,6-dibutyl-1,4-benzoquinone	55	11.3 (0.58%)	24.244	C14H20O2	997274-50-4		Decane	91	21.0 (0.59%)	24.578	C10H22	000124-18-5
Octane, 2-methyl-	80	6.7 (0.35%)	25.304	C9H20	003221-61-2		Heptadecane, 2-methyl-	78	80.2 (2.26%)	25.351	C18H38	001560-89-0
.alpha.-Muurolene	97	19.2 (0.99%)	25.425	C15H24	031983-22-9
							Phenol, 2,5-bis(1,1-dimethylethyl)-	96	20.6 (0.58%)	25.95	C14H22O	005875-45-6
							Tridecane	72	42.4 (1.20%)	26.876	C13H28	000629-50-5
Propanoic acid, 2-methyl-, 2-eth...	56	94.6 (4.88%)	28.804	C16H30O4	074367-30-9		3-(oxiran-2-yl)propyl acetate	59	182.9 (5.16%)	28.841	C7H12O3	059287-65-9
2-(Prop-2-enoyloxy)tridecane	37	25.4 (1.31%)	29.921	C16H30O2	997397-83-6		Adipic acid	37	67.6 (1.91%)	29.958	C6H10O4	000124-04-9
							Hexadecane	72	45.5 (1.28%)	32.42	C16H34	000544-76-3
							Heptadecane, 2-methyl-	90	15.7 (0.44%)	32.68	C18H38	001560-89-0
							1H-Cyclopenta[a]pentalen-7-ol, d...	94	5.3 (0.15%)	33.924	C17H28O2	057984-03-9
4a,7-Methano-4aH-naphth[1,8a-b]oxirene, octahydro-4,4,8,8-tetramethyl-	96	3.2 (0.16%)	36.662	C15H24O	067999-56-8
							Sulfurous acid, butyl pentadecyl...	90	5.9 (0.17%)	37.758	C19H40O3S	997712-57-2
							Tetracyclo[6.1.0.0(2,4).0(5,7)]n...	35	18.5 (0.52%)	38.6	C15H24	997220-77-1
